# Supplementary material
Source: publisher site journal article supplement (https://www.dovepress.com/article/420447)
Supplement: Supplementary file 1 [file get_supplementary_file.php]

**Table S1** context sequences of the probes used in genotyping

| **Gene** | **SNP ID** | **C-number** | **Context sequence [VIC/FAM]** |
| --- | --- | --- | --- |
| *OPRM1*  **A>G** | rs1799971 | C___8950074_1_ | GGTCAACTTGTCCCACTTAGATGGC**[A/G]**ACCTGTCCGACCCATGCGGTCCGAA |
| *ABCB1*  **G>A** | rs1045642 | C___7586657_20 | TGTTGGCCTCCTTTGCTGCCCTCAC**[A/G]**ATCTCTTCCTGTGACACCACCCGGC |
| *METTL21A*  **T>C** | rs2952768 | C__11510543_30 | GTGCTTTTTACTTTTATCTGAATGA**[T/C]**TGAAATGTCCTTTTCCCAATCCTAT |

**Table S2** post-operative pain score and morphine complications

| Post-operative data |  |
| --- | --- |
| Nausea | 4 |
| Vomiting | 2 |
| Acetaminophen n (%)  1gm  2gm  3gm  4gm  5gm | 9 (8.8)  17 (16.7)  20 (19.6)  40 (39.2)  8 (7.8) |
| Diclophenate n (%)  75mg  150mg | 13 (12.7)  2 (2) |
| Morphine n (%)  5mg  10mg | 26 (25.5)  1 (1) |
| Tramadol 100gm n (%) | 20 (19.6) |
| VAS over the first 24 hours, Median (range)  0.5hr  1 hr  1.5hr  6hr  24hr  Overall VAS or mean VAS | 0 (0-7)  0 (0-8)  0 (0-6)  0 (0-7)  0 (0-7)  0 (0-3.2) |

**Table S3** minor allele frequencies of the studied genetic variants in our populations compared to other population of MENA

| Population | *ABCB1 (G>A),* rs1045642 | *OPRM1 (A>G*), rs1799971 | *METTL21A (T>C),* rs2952768 |
| --- | --- | --- | --- |
| Study population n=102 | **0.38** | **0.15** | **0.26** |
| Jordanian1  Cases n=222  Controls n=218 | 0.35  0.43 | --  -- | --  -- |
| Jordanian n=5002 | 0.41 |  |  |
| Egyptians n=453  (MAF was not reported in the study I calculated it based on the genotypes reported) | 0.42 |  |  |
| Saudi children4  Cases n= 70  Controls n= 60 | 0.46  0.53 |  |  |
| Egyptians5  Controls n=49  Cases n=77 | 0.27  0.43 | 0.07  0.05 |  |
| Tunisian n=1356  MAF was not reported in the study I calculated it based on the genotypes reported) | 0.35 |  |  |
| Lebanese n=18247 | 49.2% |  |  |
| UAE8  Cases n=177  Controls n=335 |  | 0.155  0.181 |  |

References

1. Al-Eitan LN, Rababa’h DM, Alghamdi MA, Khasawneh RH. Role of four ABC transporter genes in pharmacogenetic susceptibility to breast cancer in Jordanian patients. *Journal of oncology.* 2019;2019.

2. Al-Eitan LN. Pharmacogenomic landscape of VIP genetic variants in Jordanian Arabs and comparison with worldwide populations. *Gene.* 2020;737:144408.

3. Nagy NES, Elhabiby M, Waheeb BM, Abdel Moneam MH. The Impact of Single-Nucleotide Polymorphism in the ABCB1 Gene on Opioid Dependence in an Egyptian Sample. *Addictive Disorders & Their Treatment.* 2020;19(3):152-160.

4. ElFayoumi RI, Hagras MM, Abozenadaha A, et al. The influence of polymorphisms in the drug transporter, ABCB1 on the toxicity of glucocorticoids in Saudi children with acute lymphoblastic leukaemia. *Pharmacol Rep.* 2019;71(1):90-95.

5. Enabah D, El Baz H, Moselhy H. Higher frequency of C.3435 of the ABCB1 gene in patients with tramadol dependence disorder. *Am J Drug Alcohol Abuse.* 2014;40(4):317-320.

6. Jmel H, Romdhane L, Ben Halima Y, et al. Pharmacogenetic landscape of Metabolic Syndrome components drug response in Tunisia and comparison with worldwide populations. *PLoS One.* 2018;13(4):e0194842.

7. Milane A, Khazen G, Olaywan L, et al. Frequency of ABCB1 C3435T and CYP3A5*3 Genetic Polymorphisms in the Lebanese Population. *Exp Clin Transplant.* 2021;19(5):434-438.

8. Alblooshi H, Al Safar H, El Kashef A, et al. Stratified analyses of genome wide association study data reveal haplotypes for a candidate gene on chromosome 2 (KIAA1211L) is associated with opioid use in patients of Arabian descent. *BMC Psychiatry.* 2020;20(1):41-41.
